# Supplementary material for: Highly active Au/δ-MoC and Au/β-Mo2C catalysts for the low-temperature water gas shift reaction: effects of the carbide metal/carbon ratio on the catalyst performance
Source: Royal Society of Chemistry journal article supplement (doi:10.1039/c7cy00639j), 2017-01-01

## **Highly-Active Au/ $\delta$ -MoC and Au/ $\beta$ -Mo<sub>2</sub>C Catalysts for the Low-Temperature Water Gas Shift Reaction: Effects of the Carbide Metal/Carbon Ratio on the Catalyst Performance**

Sergio Posada-Pérez,<sup>a</sup> Ramón A. Gutiérrez,<sup>b</sup> Zhijun Zuo,<sup>c,d</sup> Pedro J. Ramírez,<sup>b</sup> Francesc Viñes,<sup>a</sup>  
Ping Liu,<sup>d</sup> Francesc Illas,<sup>a,\*</sup> and José A. Rodríguez<sup>d,\*</sup>

<sup>a</sup> *Departament de Ciència de Materials i Química Física & Institut de Química Teòrica i Computacional (IQTCUB), Universitat de Barcelona, c/ Martí i Franquès 1, 08028 Barcelona, Spain.*

<sup>b</sup> *Facultad de Ciencias, Universidad Central de Venezuela, Caracas 1020-A, Venezuela.*

<sup>c</sup> *Key Laboratory of Coal Science and Technology of Ministry of Education and Shanxi Province, Taiyuan University of Technology, Taiyuan 030024, Shanxi, China.*

<sup>d</sup> *Chemistry Department, Department, Brookhaven National Laboratory, Upton, NY 11973, USA.*

**ADDITIONAL INFORMATION REGARDING COMPUTATIONAL MODELS**

Table S1 display the most relevant results for Au<sub>4</sub> clusters supported on the  $\delta$ -MoC(001) surface. Different adsorption sites have been checked and as one can be seen, the most stable structure (*Cluster 1* and *Cluster 2*) correspond to energy degenerate 3D geometries with three atoms deposited on MMC sites. *Cluster 3* represents a rotated pyramid structure where one Au atom is in contact with Mo surface atoms and the probable repulsion between them provokes the cluster tilt. Eventually, we can consider *Cluster 4* and *5* as 2D, despite of the fact that, as the same case of *Cluster 3*, the Au atoms nearby and/or in contact with Mo surface atoms are located slightly above than atoms in contact with C surface atoms. In conclusion, 3D Au<sub>4</sub> clusters are clearly more stable than 2D.

**Table S1:** Sketches, relative energies, and adsorption and adhesion energy *per* atom of Au<sub>4</sub> clusters deposited on  $\delta$ -MoC (001) surface. Mo, C, and Au are denoted by purple, green, and yellow balls, respectively.

|                            | Cluster 1                                                                         | Cluster 2                                                                         | Cluster 3                                                                          | Cluster 4                                                                           | Cluster 5                                                                           |
|----------------------------|-----------------------------------------------------------------------------------|-----------------------------------------------------------------------------------|------------------------------------------------------------------------------------|-------------------------------------------------------------------------------------|-------------------------------------------------------------------------------------|
| Side view                  | 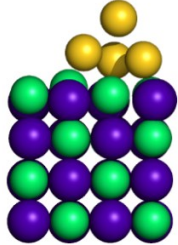 |  |  |  |  |
| Top view                   |  |  |  |  |  |
| E <sub>rel</sub> (eV)      | 0.00                                                                              | 0.02                                                                              | 0.25                                                                               | 0.45                                                                                | 0.52                                                                                |
| E <sub>ads/atom</sub> (eV) | -1.40                                                                             | -1.39                                                                             | -1.34                                                                              | -1.14                                                                               | -0.91                                                                               |
| E <sub>adh/atom</sub> (eV) | -1.79                                                                             | -1.71                                                                             | -1.68                                                                              | -1.40                                                                               | -1.01                                                                               |

**Table S2:** Energy barriers (eV) of the key steps of the WGS reaction on clean  $\delta$ -MoC(001) and Au<sub>4</sub>/ $\delta$ -MoC(001). In bold, the most favorable barrier.

| Step                                       | $\delta$ -MoC (001) | Au <sub>4</sub> / $\delta$ -MoC (001) |
|--------------------------------------------|---------------------|---------------------------------------|
| H <sub>2</sub> O $\rightarrow$ H+OH        | <b>0.53</b>         | 0.79                                  |
| OH $\rightarrow$ O+H                       | <b>1.56</b>         | 1.64                                  |
| CO+OH $\rightarrow$ COOH                   | 0.89                | <b>0.62</b>                           |
| COOH $\rightarrow$ CO <sub>2</sub> +H      | <b>0.27</b>         | > 1                                   |
| OH + OH $\rightarrow$ H <sub>2</sub> O + O | 2.22                | <b>0.44</b>                           |
| CO+O $\rightarrow$ CO <sub>2</sub>         | 1.54                | <b>0.10</b>                           |
| H + H $\rightarrow$ H <sub>2</sub>         | <b>0.75</b>         | 1.01                                  |
| H <sub>2</sub> desorption                  | 0.46                | <b>0.03</b>                           |
| CO <sub>2</sub> desorption                 | 0.85                | <b>0.05</b>                           |

**Figure S1:** Most relevant sketches of adsorption minima of the WGS reaction on clean  $\delta$ -MoC (001).

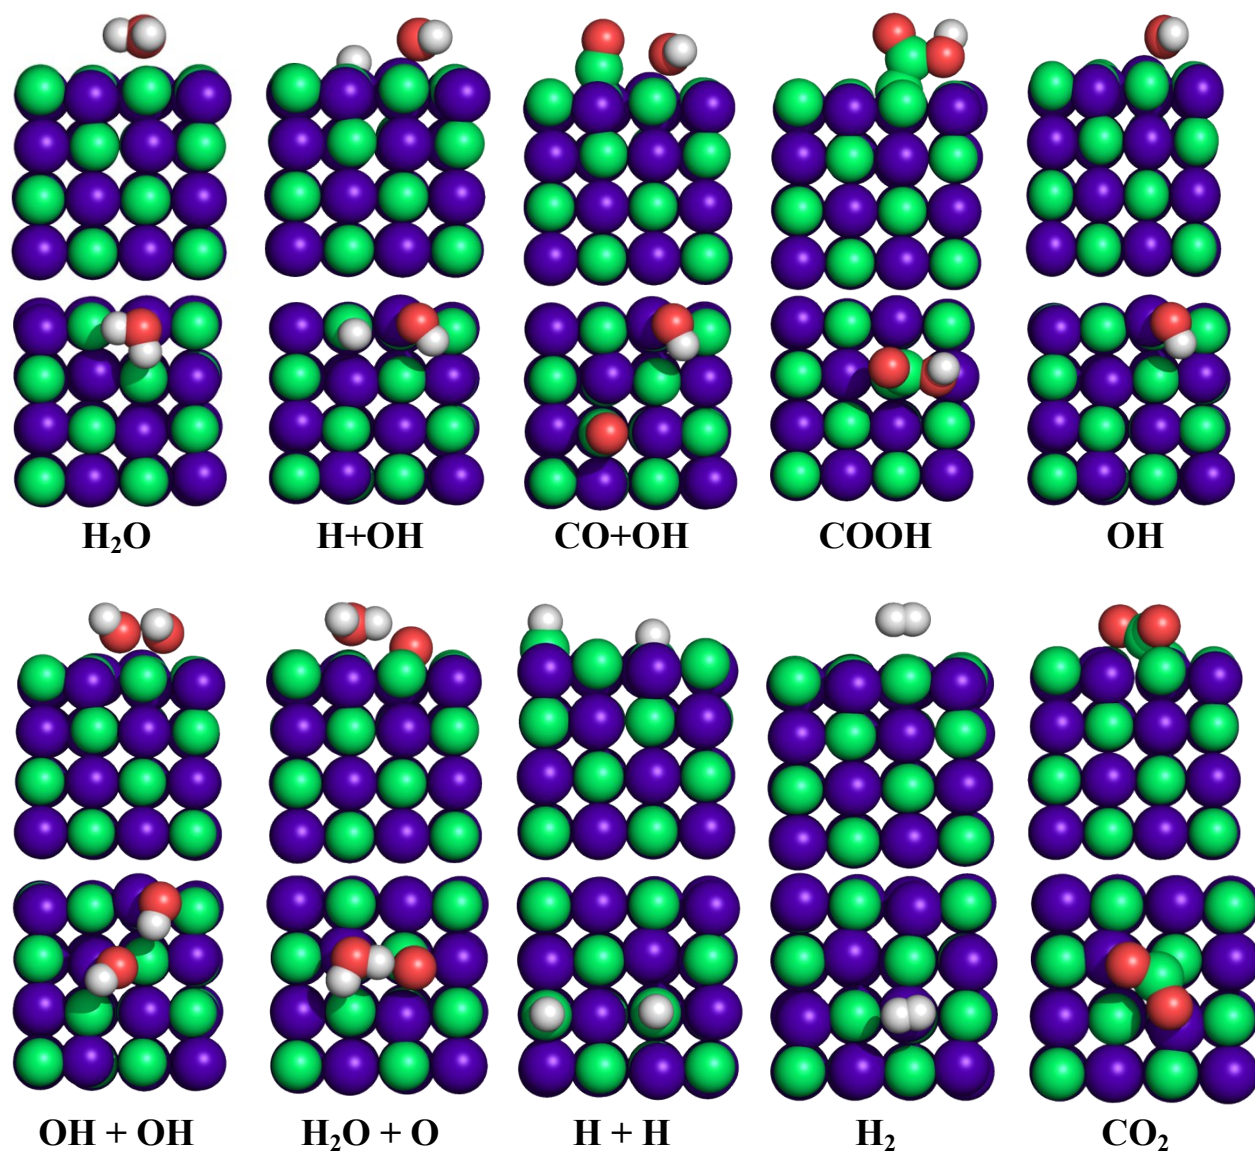

**Figure S2:** Most relevant sketches of TS structures on clean  $\delta$ -MoC (001).

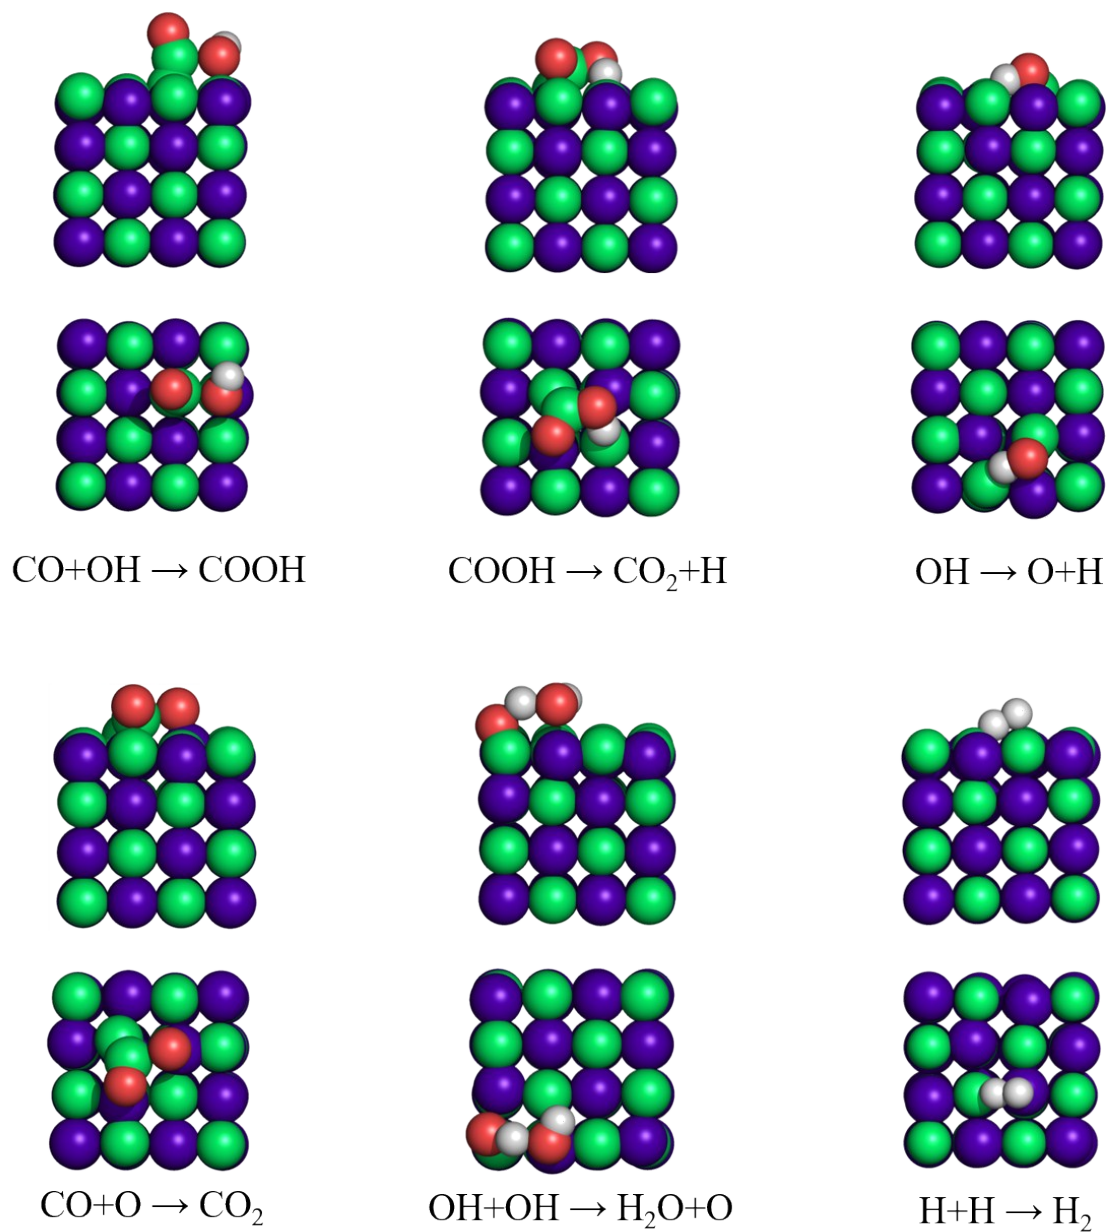



**Figure S3:** Most relevant sketches of adsorption minima of WGS on Au<sub>4</sub>/δ-MoC (001).

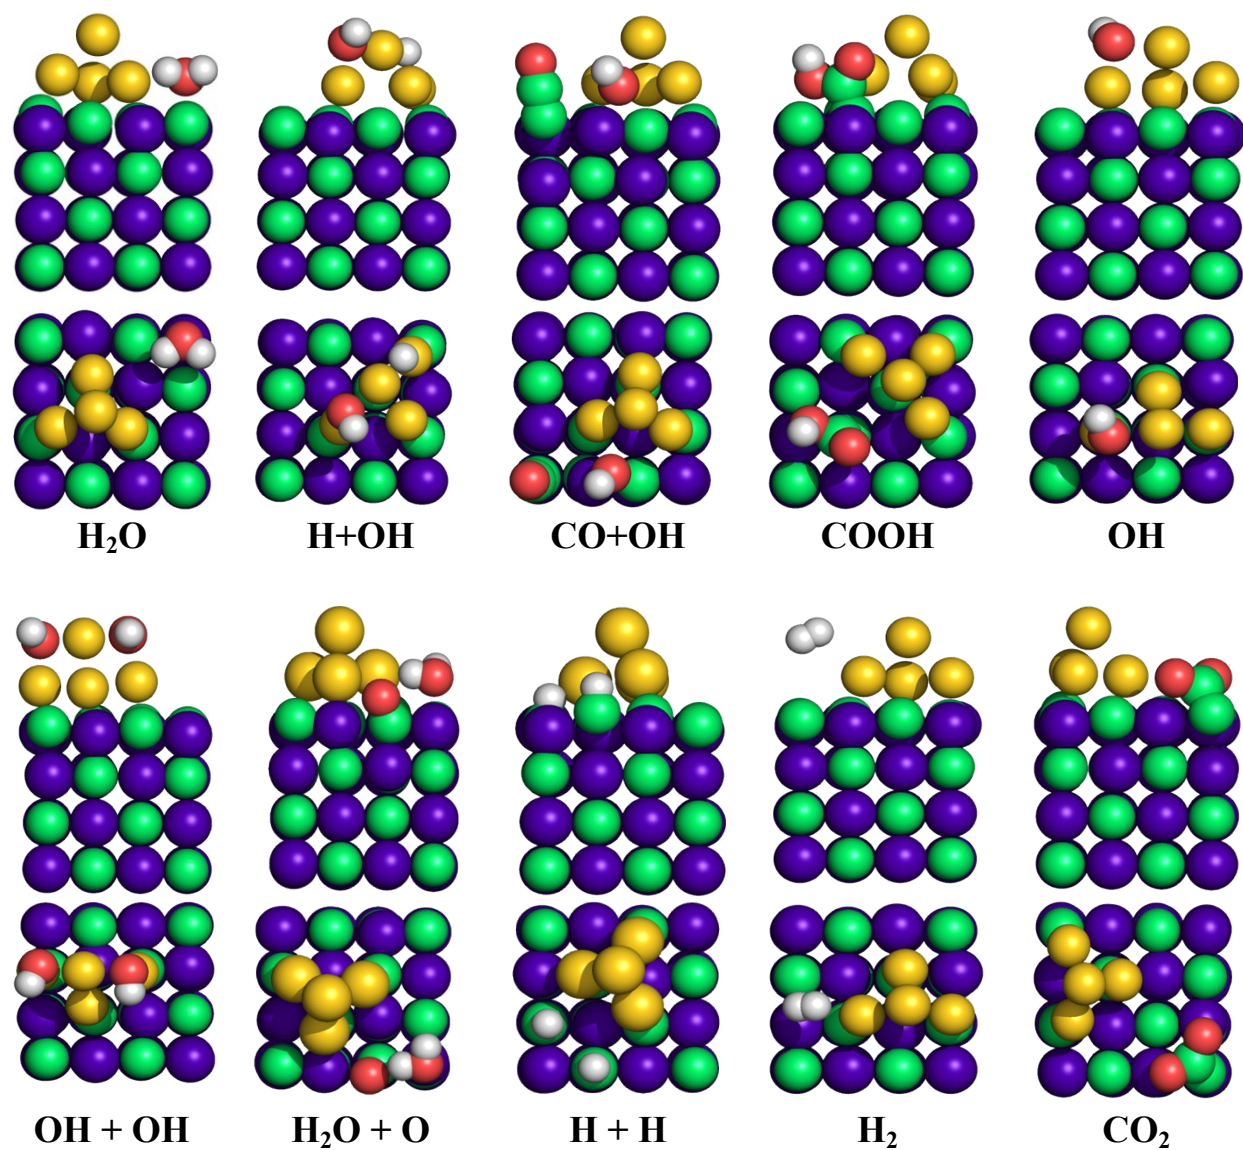

**Figure S4:** Most relevant sketches of TS structures on Au<sub>4</sub>/δ-MoC (001).

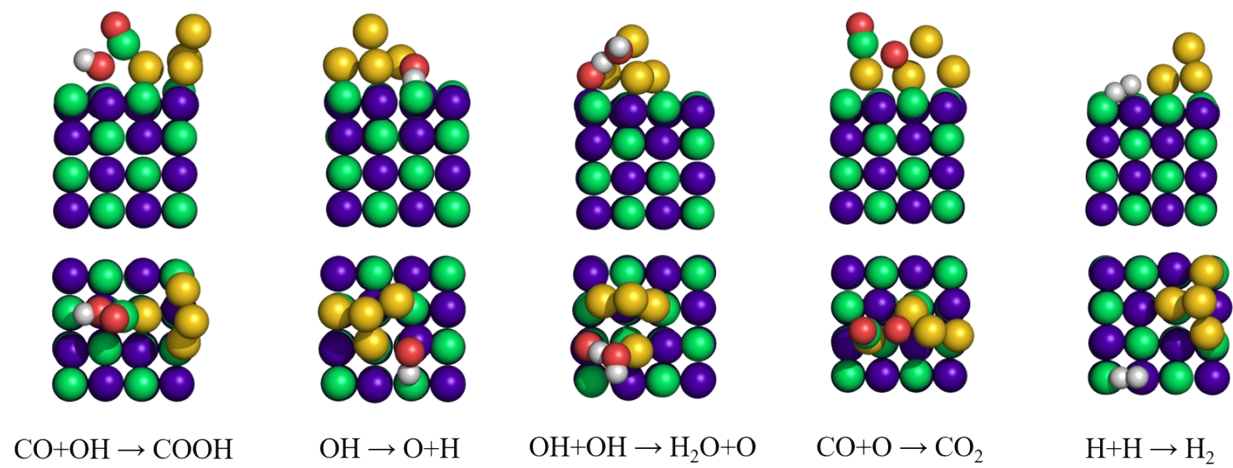

Supplement: c7cy00639j1.pdf [file c7cy00639j1.pdf]
